1 **Enhanced Protection from SARS-CoV-2 Variants by MVA-Based Vaccines**  
2 **Expressing Matched or Mismatched S Proteins Administered Intranasally to**  
3 **hACE2 Mice**

4 Catherine A. Cotter<sup>#</sup>, Jeffrey L. Americo<sup>#</sup>, Patricia L. Earl and Bernard Moss<sup>\*</sup>

5 Laboratory of Viral Diseases, National Institute of Allergy and Infectious Diseases, National

6 Institutes of Health, Bethesda, MD 20892 USA

7

8 <sup>#</sup>Contributed equally

9 <sup>\*</sup>E-mail: [bmoss@nih.gov](mailto:bmoss@nih.gov)

10

11 **ABSTRACT**

12 The continuous evolution of SARS-CoV-2 strains is contributing to the prolongation of the  
13 global pandemic. We previously reported the prevention or more rapid clearance of SARS-CoV-  
14 2 from the nasal turbinates and lungs of susceptible K18-hACE2 mice that had been vaccinated  
15 intranasally (IN) rather than intramuscularly (IM) with a recombinant MVA (rMVA) expressing  
16 a modified S protein of the ancestor SARS-CoV-2 strain. Here, we constructed additional  
17 rMVAs and pseudoviruses expressing modified S protein of SARS-CoV-2 variants and  
18 compared the ability of vaccines with S proteins that were matched or mismatched to neutralize  
19 variants, bind to S proteins and protect K18-hACE2 mice against SARS-CoV-2 challenge.  
20 Although vaccines with matched S proteins induced higher neutralizing antibodies, vaccines with  
21 mismatched S proteins still protected against severe disease and reduced virus and mRNAs in the  
22 lungs and nasal turbinates, though not as well as vaccines with matched S proteins. In mice  
23 earlier primed and boosted with rMVA expressing ancestral S, antibodies to the latter increased  
24 after one immunization with rMVA expressing Omicron S, but neutralizing antibody to Omicron  
25 required a second immunization. Passive transfer of Wuhan immune serum with Omicron S  
26 binding but undetectable neutralizing activities reduced infection of the lungs by the variant.  
27 Notably, the reduction in infection of the nasal turbinates and lungs was significantly greater  
28 when the rMVAs were administered IN rather than IM and this held true for vaccines that were  
29 matched or mismatched to the challenge SARS-CoV-2.

30

31

## 32 INTRODUCTION

33 The speed with which safe and efficacious SARS-CoV-2 vaccines were developed was a  
34 remarkable achievement. Clinical trials indicated that the mRNA vaccines were 94 to 95%  
35 effective in preventing COVID-19 illness <sup>1,2</sup> and adenovirus-based vaccines were about 74%  
36 effective <sup>3,4</sup>. Those and most other vaccines are based on the spike (S) protein, which mediates  
37 entry of the virus into cells. Initially, it was considered that the proof-reading mechanism  
38 employed by coronaviruses would greatly retard the development of escape mutants <sup>5</sup>. However,  
39 successive waves of variants and subvariants appeared with mutations in S including the receptor  
40 binding domain (RBD) and some such as Beta and Omicron exhibited resistance to antibodies  
41 elicited by ancestor strains <sup>6</sup>. Nevertheless, boosting with the original vaccines reduce serious  
42 disease, though they appear less effective in preventing infection and transmission <sup>7</sup>. Updated  
43 SARS-CoV-2 mRNA vaccines are based on expression of two S proteins: one from an ancestor  
44 and the other from a recent isolate <sup>8</sup>. Another consideration is whether intranasal (IN) or aerosol  
45 delivery would prevent infection and transmission better than intramuscular (IM) vaccination.

46 Recombinant poxvirus platforms are valuable for identifying targets of humoral and  
47 cellular immunity, have been developed into numerous veterinary vaccines and are undergoing  
48 clinical evaluation for vaccines against unrelated pathogens including SARS-CoV-2 and cancer  
49 <sup>9-11</sup>. We and others described animal studies supporting use of the host-range restricted vaccinia  
50 virus Ankara (MVA) as an alternative vector for COVID-19 vaccines <sup>12-16</sup>. Recent animal studies  
51 demonstrated advantages of IN delivery of recombinant MVAs (rMVAs) expressing S <sup>17-19</sup>.  
52 Anti-SARS-CoV-2 IgA and IgG as well as specific T cells were detected in the lungs of IN  
53 vaccinated mice and virus was diminished in the upper and lower respiratory tracts following

54 challenge of K18-hACE2 mice with SARS-CoV-2. Here we describe the construction and  
55 immunogenicity of rMVAs expressing the S proteins of several variant SARS-CoV-2 strains.  
56 The neutralizing and S binding activities of sera following matched and mismatched rMVA  
57 boosts were determined as well as protection of K18-hACE2 mice vaccinated IN and IM and  
58 challenged IN with SARS-CoV-2 variants. Vaccines that produced low neutralizing activities to  
59 mismatched SARS-CoV-2 variants still provided durable protection, but vaccines matched to the  
60 challenge virus elicited higher neutralizing activities and were more effective. For both matched  
61 and mismatched immunizations, the IN route was better than IM at reducing virus infection of  
62 the upper and lower respiratory tracts. In mice earlier primed and boosted with rMVA expressing  
63 ancestral S, antibodies to the latter increased after one immunization with rMVA expressing  
64 Omicron S, but neutralizing antibody to Omicron required a second immunization.

65

## 66 **RESULTS**

67 **Relative virulence of SAR-CoV-2 variants in the K18-hACE2 mouse model.** We previously  
68 reported that serum from mice vaccinated with an rMVA expressing the spike protein of the  
69 ancestor Wuhan strain of SARS-CoV-2, that was modified to stabilize the pre-fusion structure  
70 and enhance membrane localization (rMVA-W), neutralized recombinant vesicular stomatitis  
71 virus (rVSV) pseudoviruses expressing divergent S proteins to varying degrees<sup>18</sup>. This cross-  
72 reactivity led us to evaluate the ability of rMVA-W and rMVAs expressing variant S proteins to  
73 protect K18-hACE2 mice against challenge with SARS-CoV-2 variants. Before undertaking  
74 protection studies, we compared the relative virulence of four SARS-CoV-2 variants, CoV-  
75 Washington (W, S identical to Wuhan), -Beta (B), -Delta (D), and -Omicron (O, BA.1.1) in the  
76 mouse model system. Following IN infection of the hACE2 mice with CoV-W, -B and -D,

77 weight loss was detected with a dose of  $10^2$  TCID<sub>50</sub> (Fig. S1A–C) and 100% death occurred with  
78  $10^4$  TCID<sub>50</sub> (Fig. S1D–F). CoV-O was less virulent than the others, with only two of five mice  
79 succumbing on day 7 to a dose of  $5 \times 10^4$  (Fig. S1G). For a further comparison, the hACE2 mice  
80 were inoculated IN with varying doses of CoV-W or -O and the amounts of virus in the lungs  
81 and nasal turbinates determined. The lungs of CoV-W-infected mice contained 100- to 1,000-  
82 fold more virus than the lungs of CoV-O-inoculated mice on day 2 (Fig. S1H). At that early time,  
83 virus was detected in the nasal turbinates only of mice inoculated with CoV-W (Fig. S1I). Our  
84 finding that CoV-O is less virulent than other variants in mice is in accord with other studies<sup>20,21</sup>.  
85 In subsequent challenge experiments, a dose of  $5 \times 10^4$  TCID<sub>50</sub> (highest possible dose due to titer)  
86 was used for CoV-O and  $10^4$  TCID<sub>50</sub> for the others.

87

#### 88 **Protective immunity to SARS-CoV-2 variants following IM vaccination with rMVA-W.**

89 K18-hACE2 mice were vaccinated IM twice 3 weeks apart with the parental MVA as a control  
90 or with rMVA-W and challenged with CoV variants 2 weeks later (Fig. 1A). Antibody binding  
91 to the Wuhan RBD was detected by ELISA after the first immunization and was not increased  
92 significantly by the second (Fig. 1B). Pseudoviruses, named for the spike protein that they  
93 express, were neutralized in the order rVSV-W > D > -B after the first immunization (Fig. 1C).  
94 The neutralization titers increased significantly after the second immunization for the vaccine  
95 mismatched rVSV-B and rVSV-D but not for the matched rVSV-W, which was already high.

96       Following challenge with CoV-W, -B or -D, mice that received the control MVA vector  
97 lost weight and died by day 6, whereas mice that received rMVA-W lost no weight and survived  
98 infection with each of the variants (Fig. 1D, E). Five additional mice in each group were  
99 sacrificed on day 5, prior to severe morbidity, for analysis of virus titers and subgenomic (sg)

100 RNAs in internal organs. Substantial amounts of each of the SARS-CoV-2 viruses were detected  
101 by infectivity assays in the lungs and turbinates of control mice that received the MVA vector,  
102 whereas none was detected in mice that received rMVA-W regardless of the challenge strain of  
103 virus (Fig. 1F, G). Analysis of sgRNAs provides an alternative and more sensitive assay for  
104 replication than the titer of infectious SARS-CoV-2 from tissues<sup>22</sup> and sgN is most abundant  
105 followed by sgS<sup>23</sup>. Digital droplet polymerase chain reaction (ddPCR) was used to detect sgN  
106 and sgS in our study and the values normalized to 18s ribosomal RNA in each sample. High  
107 levels of sgN and sgS RNAs were detected in the lungs of the control mice that received the  
108 MVA vector following challenge with each of the variants. In contrast, sgRNAs were not  
109 detected in mice immunized with rMVA-W and challenged with CoV-W and the levels were  
110 significantly diminished in mice challenged with CoV-B and -D (Fig. 1H). High titers of  
111 sgRNAs were also present in the nasal turbinates of challenged mice that had been immunized  
112 with the control MVA but were undetected or significantly diminished in mice that had been  
113 immunized with rMVA-W (Fig. 1I). These results indicated that a vaccine expressing the Wuhan  
114 S and administered IM protected against weight loss and death and significantly reduced the  
115 replication of CoV-B and -D by day 5, despite lower levels of neutralizing antibody to their S  
116 proteins. Nevertheless, virus replication in the lungs as determined by sgRNAs was lowest when  
117 the S proteins of the vaccine and challenge were matched.

118

119 **Duration of cross-protective immunity following IM vaccination with rMVA-W.** In the  
120 above experiment, mice were challenged at 3 weeks after vaccination when antibody levels were  
121 near their peak. To determine the duration of cross-protective immunity, additional groups of  
122 K18-hACE2 mice were vaccinated IM twice and held for 9 months (Fig. 2A). Over this period,

123 the binding to the Wuhan S protein decreased by about 70% (Fig. 2B). The neutralizing titer for  
124 each variant was boosted by the second immunization but then each also decreased substantially  
125 over time (Fig. 2C).

126 After challenge with the SARS-CoV-2 variants, mice that had received the control MVA  
127 vector lost ~10 to 20% of their starting weight by day 5; mice immunized with rMVA-W and  
128 challenged with CoV-W lost little weight while those challenged with CoV-B and -D were  
129 intermediate (Fig. 2D). Mice that received the control MVA vector had substantial amounts of  
130 virus in the lungs and turbinates on day 5 following challenge, whereas mice that had been  
131 vaccinated with rMVA-W had little or no virus regardless of which SARS-CoV-2 strain was  
132 used for challenge (Fig. 2E, F). Substantial differences, however, were revealed by analysis of  
133 sgRNAs. Mice vaccinated with rMVA-W and challenged with CoV-W had >3-log mean  
134 reduction of sgRNAs in the lungs compared to controls whereas mice challenged with CoV-B  
135 and -D had 1- to 2-log mean reductions (Fig. 2G). The same trend was observed in the nasal  
136 turbinates: mice challenged with CoV-W had no detectable sgRNAs, whereas sgRNAs were  
137 significantly reduced relative to controls in mice challenged with CoV-B and -D (Fig. 2H). We  
138 concluded that protection was durable, but at a reduced level at 9 months and was greater when  
139 the vaccine and challenge virus were matched.

140

141 **Comparison of IM and IN immunizations with rMVA-W on inhibition of early stages of**  
142 **variant infections.** The experiments described thus far demonstrated that IM vaccination with  
143 rMVA-W protected mice from lethal infection with Beta and Delta strains and reduced virus and  
144 sgRNAs present in the lungs and nasal turbinates by day 5 after challenge. For the next  
145 experiments, we analyzed virus titers and sgRNAs at 2 and 4 days after infection with SARS-

146 CoV-2 to determine the effect of vaccination on earlier stages of infection (Fig. 3A). Binding to  
147 the Wuhan S RBD was detected after the first immunization and increased slightly after the  
148 second (Fig. 3B). Neutralization titers obtained with pseudoviruses expressing variant spike  
149 proteins were in the order rVSV-W >-D >-B >-O (Fig. 3C). Titers were boosted by the second  
150 immunization but, even then, less than half of the mice had serum that neutralized rVSV-O  
151 above the limit of detection.

152       Following challenge of mice receiving the control MVA vector, the virus titers in the  
153 lungs were highest on day 2 and reduced to varying degrees on day 4 for each variant (Fig. 3D).  
154 Notably, no virus was recovered from the lungs on either day from mice vaccinated with rMVA-  
155 W and challenged with CoV-W, -B, -D or -O. Mice that received the control MVA vector and  
156 were subsequently challenged had substantial amounts of virus in the nasal turbinates that were  
157 higher on day 2 than day 4 except for CoV-O, in which none was detected (Fig. 3E). For mice  
158 vaccinated with rMVA-W, the CoV-W, -B or -D titers in the turbinates were reduced relative to  
159 the controls on day 2 and undetectable on day 4. The presence of SARS-CoV-2 in the turbinates  
160 of vaccinated mice was missed in the previous experiment (Fig. 2F) when only day 5 was  
161 examined. High amounts of sgRNAs were found in the lungs of mice inoculated with the control  
162 MVA, on days 2 and 4 after challenge with the variants including CoV-O (Fig. 3F). In contrast to  
163 the controls, mice that had been immunized with rMVA-W and challenged with CoV-W had  
164 little or no sgRNA in the lungs on either day, whereas virus was reduced but still detected on  
165 both days after challenge with the other variants (Fig. 3F). In the nasal turbinates, sgRNAs were  
166 detected on days 2 and 4 of mice that received the control MVA vector and challenged with each  
167 of the variants including CoV-O, whereas sgRNAs were detected in vaccinated mice challenged  
168 with CoV-W or variants only on day 2 (Fig. 3G). These data indicated that IM vaccination with



169 rMVA-W reduced replication of each of the variants but did not prevent infection as judged by  
170 the detection of virus and sgRNAs in the lungs and turbinates. Interestingly, although rMVA-W  
171 induced low Omicron neutralizing activity as measured *in vitro*, the lung titers of Omicron were  
172 significantly reduced in vaccinated mice.

173 We previously reported that IN administration of rMVA-W prevented or more rapidly  
174 eliminated upper respiratory infection with CoV-W than when administered IM<sup>18</sup>. Here, we  
175 wanted to determine whether IN delivery is advantageous for cross-protection of variants. Mice  
176 were inoculated with the MVA control or rMVA-W as in the previous experiment, except that  
177 the route was IN (Fig. 4A). Antibody binding to the RBD of the Wuhan spike protein was  
178 detected after the first immunization with rMVA-W and increased slightly after the second (Fig.  
179 4B). The second immunization with rMVA-W significantly increased neutralizing antibodies in  
180 the blood to each of the variants except Omicron (Fig. 4C), as was the case for IM immunization.  
181 Following challenge of mice that received the control MVA, the CoV-W and variant strains were  
182 detected in the lungs and turbinates on day 2 and decreased on day 4 (Fig. 4D, E). In addition,  
183 considerable amounts of CoV-B and lesser amounts of CoV-D were recovered from the brains of  
184 the control mice on day 4 (Fig. 4F). However, in mice vaccinated IN with rMVA-W, virtually no  
185 virus of any strain was detected on days 2 or 4 in lungs, nasal turbinates or brains of mice (Fig.  
186 4D-F), whereas considerable virus had been detected on day 2 in the turbinates of mice that had  
187 been vaccinated IM (Fig. 3E). Furthermore, sgRNAs were greatly reduced on day 2 and virtually  
188 absent on day 4 in the lungs of IN-vaccinated mice following challenge with CoV-W, -B or -D  
189 and were significantly reduced after challenge with CoV-O compared to controls (Fig. 4G).  
190 Moreover, sgRNAs were undetectable or detected at very low levels in the turbinates of mice  
191 infected with any of the variants on day 2 and none was detected on day 4 (Fig. 4H), in contrast

192 to the results obtained by IM vaccination (Fig. 3G). For each variant, there was a greater  
193 reduction of sgRNAs in mice immunized IN compared to IM as depicted for the nasal turbinates  
194 on day 2 (Fig. 4I). Thus, IN vaccination with rMVA-W was advantageous for protection against  
195 variant as well as matched challenges.

196

197 **Construction and immunogenicity of rMVAs with variant spikes.** Thus far, we immunized  
198 mice with rMVA expressing the Wuhan S protein and challenged with variant SARS-CoV-2. For  
199 the next experiments, we constructed rMVAs expressing the S proteins of variant strains.  
200 Equivalent S protein expression was verified by analysis of infected HeLa cells by Western  
201 blotting using antibody to the FLAG tag (Fig. S2A, B), although there was some difference in  
202 binding of anti-Wuhan RBD to the variants reflecting sequence differences (Fig. S2A, C). Cell  
203 surface expression of the S proteins and binding to hACE2 were demonstrated by flow cytometry  
204 (Fig. S2D). To compare their immunogenicity, C57BL/6 mice were vaccinated IM with rMVAs  
205 expressing variant S proteins followed by a boost with the same rMVA used for the first  
206 vaccination (Fig. 5A). The neutralization of pseudoviruses expressing spike proteins matched or  
207 mismatched to the vaccines were determined (Fig. 5B). Sera from mice immunized with rMVA-  
208 W neutralized rVSV-W significantly better than rVSV-D and had no detectable activity against  
209 rVSV-O. After the second vaccination with rMVA-W, neutralizing antibody to rVSV-W and -D  
210 were increased but most of the mice still made no detectable neutralizing antibody to rVSV-O.  
211 Sera from mice vaccinated with rMVA-D neutralized rVSV-W almost as well as rVSV-D but  
212 also had low neutralizing activity to rVSV-O and only small increases occurred after the second  
213 immunization. Sera from mice that received rMVA-O had little or no neutralizing activity to  
214 rVSV-W or -D but had detectable activity against the matching rVSV-O. After two and three

215 rMVA-O vaccinations, neutralization of rVSV-O was boosted but the neutralizing titers to  
216 rVSV-W and -D were minimally increased.

217         The S proteins expressed by the rMVA vectors had been modified to stabilize the pre-  
218 fusion form, prevent furin cleavage and increase cell surface expression as described previously  
219 <sup>12</sup>. To be certain that these changes were not responsible for diminished cross-neutralizing  
220 activity, we obtained sera from K18-hACE2 mice that had been sublethally infected with CoV-  
221 W, CoV-B, CoV-D or CoV-O in the experiment of Fig. S1). The cross-neutralizing activities of  
222 these serum samples were similar to serum obtained from vaccinated mice (Fig. 5D).

223         In contrast to the low neutralizing antibody, sera from mice immunized twice with  
224 rMVA-W exhibited substantial binding to the S proteins of Delta and Omicron, although  
225 significantly less than to the Wuhan S protein, whereas sera from mice immunized multiple  
226 times with rMVA-O bound to similar extents to Wuhan and Omicron S proteins (Fig. 5C). We  
227 considered that the relatively greater binding of sera to mismatched S proteins compared to their  
228 neutralizing ability may have significance for cross-protection *in vivo*. To investigate this, pooled  
229 sera from mice vaccinated IM with rMVA-W or rMVA-O were inoculated IP into K18-hACE2  
230 mice. One day after serum transfer and just before challenge with CoV-O, the NT50 values of  
231 the sera from rMVA-W-vaccinated mice were >400 for rVSV-W and undetectable for rVSV-O  
232 (Fig. 5E). The corresponding NT50 values for the mice receiving sera from rMVA-O-vaccinated  
233 mice were >100 for rVSV-O and undetectable or barely detectable for rVSV-W. Despite the  
234 difference in neutralizing titers, no CoV-O was recovered from the lungs at 4 days after  
235 challenge of mice receiving anti-Wuhan or anti-Omicron sera (Fig. 5F). However, the mice that  
236 received anti-Omicron serum also had reduced sgN and sgS RNAs in the lungs, whereas the  
237 mice that received anti-Wuhan serum did not (Fig. 5G). These data indicated that the anti-Wuhan

238 serum without detectable *in vitro* neutralizing activity for Omicron was partially protective *in*  
239 *vivo* but that the neutralizing anti-Omicron serum was more potent

240

241 **Neutralizing antibody responses to mismatched prime and boost vaccinations.** A related

242 question is whether heterologous boosting with variant spike proteins will increase neutralizing

243 activity to the original spike protein, the variant or both. To investigate this, C57BL/6 mice were

244 vaccinated twice with rMVA-W. After 30 weeks, the mice were bled and groups of 9 to 10 mice

245 were re-vaccinated with rMVA-W, -B, -D or -O (Fig. 5H). The neutralizing titer against the

246 original immunogen rVSV-W as well as rVSV-B and rVSV-D increased after boosting with each

247 of the variant rMVAs with the exception of rVSV-O (Fig. 5I). Because of the low neutralization

248 titer against Omicron obtained following immunization twice with rMVA-W and once with

249 rMVA-O or other rMVA variants, we decided to boost all the mice a second time with the same

250 rMVAs used in the previous boost. None of the boosts increased the neutralizing titer to rVSV-

251 W, rVSV-B or rVSV-D. However, the rMVA-O boost significantly increased the neutralizing

252 titer to rVSV-O, whereas none of the other boosts did (Fig. 5J). These results indicated that a

253 second immunization with rMVA-O is beneficial both for naïve mice as well as mice primed

254 with the rMVA expressing the ancestor S protein.

255

256 **Protective immunogenicity of rMVAs expressing variant S proteins.** Next, we analyzed

257 replication of CoV-W and CoV-O in mice that had been vaccinated IM with rMVA-W or

258 rMVA-O (Fig. 6A). As shown earlier in this study, immunization of K18-hACE2 mice with

259 rMVA-W elicited high neutralizing antibody to rVSV-W and very little to rVSV-O, whereas the

260 converse occurred following immunization with rMVA-O (Fig. 6B). Nevertheless, Immunization

261 with either rMVA-W or rMVA-O significantly reduced the titer of CoV-W in the lungs (Fig. 6C)  
262 and turbinates (Fig. 6D) although immunization with rMVA-W was more effective on day 2. No  
263 virus was detected in the lungs or turbinates of mice immunized with either rMVA-W or rMVA-  
264 O and challenged with CoV-O, although it is important to note the low amount of CoV-O in the  
265 lungs and barely detectable CoV-O in the nasal turbinates.

266 Analysis of sgRNAs provided a better basis for comparison of the protection afforded by  
267 the different immunizations. Immunization with rMVA-W provided complete protection of the  
268 lungs from CoV-W on days 2 and 4, whereas immunization with rMVA-O provided significant  
269 but partial protection (Fig. 6E). Nevertheless, the two vaccines provided similar 2-log reduction  
270 of sgRNAs in the lungs of mice infected with CoV-O (Fig. 6E). In the nasal turbinates, sgRNAs  
271 were reduced on day 2 and undetectable on day 4 after challenge with CoV-W regardless of  
272 whether the mice were immunized with rMVA-W or rMVA-O (Fig. 6F). CoV-O sgRNAs were  
273 also reduced by similar amounts in the nasal turbinates when vaccinated with either rMVA-W  
274 and rMVA-O. These data indicated that significant protection can occur even if low neutralizing  
275 antibody is induced.

276 Next, we investigated the use of rMVA-O as a nasal vaccine (Fig. 7A). After the second  
277 immunization with rMVA-O, neutralizing antibody to rVSV-O was similar or higher than that  
278 obtained by IM but again there was little or no neutralization of rVSV-W (Fig. 7B). The control  
279 mice challenged with CoV-W succumbed to the infection, whereas those challenged with CoV-O  
280 had only a transient weight loss due to the low pathogenicity of the latter (Fig. 7C). Mice  
281 vaccinated IN with rMVA-O had no weight loss following challenge with either CoV-W or  
282 CoV-O (Fig. 7C). There was low or no recovery of virus (Fig. 7D) and significantly diminished  
283 sgRNAs in the lungs of mice challenged with either CoV-W or CoV-O (Fig. 7E). Even more

284 striking was the reduction of virus (Fig. 7F) and sgRNAs (Fig. 7G) in the nasal turbinates of  
285 mice challenged with CoV-W or CoV-O. The much greater reduction of sgRNAs following IN  
286 vaccination than IM vaccination is shown for the turbinates on day 2 in Fig. 7H.

287

## 288 **DISCUSSION**

289 The SARS-CoV-2 pandemic has entered a phase in which large segments of the population have  
290 some immunity due to previous infection or vaccination. While there has been a drop in serious  
291 disease and hospitalization, variants continue to arise and spread. In the present study we  
292 investigated several topics related to vaccine efficacy in the current situation, including cross-  
293 neutralization of variants, boosting with variant S proteins, role of non-neutralizing antibody and  
294 particularly enhanced protection by IN administration of matched and mismatched vaccines. We  
295 used MVA, an attenuated vaccinia virus vector, that has been extensively used for  
296 immunological studies and is currently in clinical vaccine trials for a variety of infectious  
297 diseases including SARS-CoV-2. Before carrying out these investigations, we compared the  
298 abilities of variant SARS-CoV-2 strains to infect susceptible K18-hACE2 mice. Whereas,  
299 Washington, Beta and Delta strains were highly lethal, Omicron was less so and lower titers of  
300 the latter virus were recovered from the upper and lower respiratory tract. However, the amounts  
301 of sgRNAs in the lungs and nasal turbinates of the different strains were more similar allowing a  
302 better comparison of their replication. In addition, we constructed a panel of rMVA vaccines and  
303 a panel of rVSV pseudoviruses expressing variant S proteins. Initially we focused on the ability  
304 of rMVA-W, expressing the ancestor Wuhan S protein, to induce cross-neutralizing antibodies.  
305 In line with studies using other vaccine platforms, we found that neutralization was in the order  
306 of Wuhan > Delta > Beta > Omicron. Repeated immunizations with rMVA-W increased

307 neutralization titers to Delta and Beta but hardly to Omicron, which has the most divergent S-  
308 protein, and none approached that to Wuhan itself. Nevertheless, vaccination with rMVA-W  
309 protected hACE2 mice against weight loss and death and reduced virus replication in the upper  
310 and lower respiratory tracts for at least 9 months. However, whereas no replication of the  
311 ancestral strain of SARS-CoV-2 was detected in the lungs by sensitive sgRNA analysis, some  
312 replication of other strains was found though significantly reduced compared to controls.  
313 Although rMVA-W elicited little anti-Omicron neutralizing antibody, there was appreciable  
314 Omicron S-binding antibody that provided partial protection when passively transferred to mice.  
315 In another study, Kaplonek and co-workers <sup>24</sup> determined that mRNA-1273 vaccine-induced  
316 antibodies maintain Fc effector functions across variants, which could explain the protection  
317 seen here. We previously reported that rMVA-W stimulated antigen-specific T cells <sup>12</sup> and the  
318 majority of the peptides in the positive pools are present in the variant S proteins. The conclusion  
319 from this phase of the study was that the mouse model mimicked clinical experience in that  
320 immunity to the ancestral SARS-CoV-2 protected against severe disease by variants but only  
321 partially prevented infection and replication.

322         To better understand whether the differences in neutralization and protection were mainly  
323 due to the mismatching of antibodies or to intrinsic resistance of variants to neutralization, we  
324 immunized mice with rMVAs-W, -D or -O and determined the neutralization titers to matched  
325 and mismatched pseudoviruses. In each case, neutralization of the matched pseudovirus was  
326 greater than mismatched though the difference was least between Wuhan and Delta and greatest  
327 between Omicron and the others. Nevertheless, even though rMVA-O induced antibodies that  
328 significantly neutralized rVSV-O, the titers were less than those elicited by rMVA-W for Wuhan  
329 or rMVA-D for Delta. Similar diminished cross-neutralizing antibodies were found in sera from

330 hACE2 mice infected with sublethal doses of SARS-CoV-2 variants demonstrating that this was  
331 not a problem with the vaccines.

332 Another pertinent question was whether boosting mice that had been vaccinated with  
333 rMVA-W with rMVA-B, -D, or -O would increase antibodies to Wuhan S (original antigenic  
334 sin), to the variants or both. Following two vaccinations with rMVA-W, a single vaccination  
335 with rMVA-B or rMVA-D boosted the neutralization titers to Wuhan as well as to self. Although  
336 a single immunization with rMVA-O boosted neutralizing antibody to the other variants, a  
337 second vaccination with rMVA-O was required to induce neutralizing antibody to itself. Thus,  
338 two rMVA-O vaccinations were needed to raise Omicron neutralizing antibody in both naïve  
339 mice and mice that had been previously vaccinated with rMVA-W. Although not directly  
340 measured, it seems likely that in each case the first Omicron vaccination elicited Omicron-  
341 specific memory cells that were activated on the second vaccination.

342 By analyzing virus and sgRNAs in nasal turbinates and lungs at 2 and 4 days after SARS-  
343 CoV-2 infection of K18-hACE2 mice, we confirmed our previous data on the better protection  
344 afforded by IN compared to IM vaccination with rMVA-W. In the latter study, induction of  
345 antigen-specific IgA and higher numbers of CD8<sup>+</sup> T cells were found in the lungs. Here we  
346 showed that IN vaccination also provided greater protection against other SARS-CoV-2 variants  
347 following immunization with matched as well as mismatched S vaccines. These studies should  
348 encourage the evaluation of nasal or aerosol vaccines to boost immunity in clinical trials.

349

350 **MATERIALS AND METHODS**



351 **Mice.** Five- to six-week-old female C57BL/6ANTac and B6.Cg-Tg(K18-hACE2)2Prlmn/J mice  
352 were obtained from Taconic Biosciences and Jackson Laboratories, respectively. Typically, 3-5  
353 mice were housed per sterile, ventilated microisolator cage in an ABSL-2 or ABSL-3 facility.

354  
355 **MVA viruses and cells.** rMVA-B, rMVA-D and rMVA-O viruses were constructed as described  
356 previously <sup>12</sup>. All rMVA viruses were purified by two consecutive sucrose gradients. Vero E6  
357 cells (ATCC CRL-1586) and Vero E6 hTMPRSS2 hACE2 <sup>18</sup> were maintained in Dulbecco's  
358 Modified Eagle Medium supplemented with 8% heat-inactivated fetal bovine serum, 2 mM L-  
359 glutamine, 10 U/ml penicillin, and 10 µg/ml streptomycin.

360  
361 **Vaccination.** Viruses used for vaccination were thawed, dispersed by sonication, and 10-fold  
362 serial dilutions were made in phosphate buffered saline containing 0.05% bovine serum albumin,  
363 resulting in concentrations ranging from  $2 \times 10^8$  to  $2 \times 10^4$  PFU/ml. The rMVAs in 50 µl were  
364 injected IM into each hind leg of the mouse. For IN vaccination, mice were lightly sedated with  
365 isoflurane and 50 µl of rMVAs administered.

366  
367 **Infection with SARS-CoV-2.** SARS-CoV-2 USA-WA1/2020 from BEI resources (Ref# NR-  
368 52281) was propagated in Vero cells (CCL81); SARS-CoV-2 Beta (RSA 1.351 501Y) from the  
369 NIAID Integrated Research Facility at Ft. Detrick; SARS-CoV-2 Delta (hCoV-19/USA/MD –  
370 HP05285/2021 VOC G/478K.V1 B.1.617.2+AY.1+AY.2) from Andrew Pekosz at Johns  
371 Hopkins University, and SARS-CoV-2 Omicron BA.1 (Ref EPI-ISL\_7171744) from Vincent  
372 Munster of the NIAID Laboratory of Virology were propagated in TMPRSS2 VeroE6 cells . The  
373 clarified culture medium was titrated on Vero E6 hTMPRSS2 cells and the TCID<sub>50</sub> was

374 determined by the Reed-Muench method. SARS-CoV-2 were amplified and purified in a BSL-3  
375 laboratory by Reed Johnson and Nicole Lackemeyer of the NIAID COVID Virology Core  
376 Laboratory. Aliquots consisting of  $10^2$  to  $5 \times 10^4$  TCID<sub>50</sub> of SARS-CoV-2 in 50  $\mu$ l were  
377 administered IN to mice that were lightly sedated with isoflurane. After infection, the weights  
378 and morbidity/mortality status were assessed and recorded daily for up to 14 days.

379

380 **Detection of Wuhan S, Omicron S, and RBD binding IgG and antibodies by ELISA.** SARS-  
381 CoV-2 (2019-nCoV) spike (S1+S2 ECD protein, Sino Biologicals), Omicron BA 1.1 spike (from  
382 Dr. Raul Cachau, NIAID) or CoV-2 Spike RBD (His-Tag, Genscript) was diluted in phosphate  
383 buffered saline (PBS) to a concentration of 1  $\mu$ g/ml. MaxiSorp 96-well flat-bottom plates  
384 (Thermo Fisher) were filled with 100  $\mu$ l of diluted S protein (0.1  $\mu$ g/well) and incubated  
385 overnight at 4°C. After adsorption, wells were washed three times with 250  $\mu$ l PBS + 0.05%  
386 Tween-20 (PBS-T, Accurate Chemical). Plates were blocked for 2 h at room temperature with  
387 200  $\mu$ l PBS-T + 5% nonfat milk and subsequently washed three times with PBS-T prior to  
388 incubation with a series of eight 4-fold dilutions of mouse sera for 1 h at room temperature. To  
389 detect S-specific IgG antibodies, plates were washed three times with PBS-T and incubated with  
390 horse radish peroxidase (HRP)-conjugated goat anti-mouse IgG (H+L) (Thermo Fisher) for 1 h  
391 at room temperature. After incubation plates were washed three times with PBS-T and 100  $\mu$ l of  
392 pre-warmed SureBlue TMB substrate (SeraCare) was added to the plate for 10 min at room  
393 temperature. To stop the colorimetric reaction, 100  $\mu$ l of 1N sulfuric acid was added to each well  
394 and absorbance was measured at A<sub>450</sub> and A<sub>650</sub> using a Synergy H1 plate reader with Gen5  
395 analysis software (Agilent Technologies). IgG endpoint titers were determined as 4-fold above  
396 the average absorbance of those wells not containing primary antibody.

397

398 **Pseudovirus neutralization assays.** BHK-21 cell lines expressing SARS-CoV-2 codon  
399 optimized spikes with truncation of the 19 C-terminal amino acids were prepared and used to  
400 generate rVSVDG–GFP-CoV2 spike pseudoviruses as previously described<sup>18</sup>. For the rVSVDG  
401 pseudoviral neutralization assay, serial dilutions of heat-inactivated sera were incubated with  
402 rVSVDG pseudoviruses and anti-VSV-G I1 hybridoma supernatant (ATCC# CRL-2700) for 45  
403 min at 37°C. The mixture was then added to VeroE6 cells expressing hTMPRSS2 and hACE2  
404 and incubated for 20 h at 37°C. The cells were fixed in 2% paraformaldehyde and GFP measured  
405 by flow cytometry. NT50 values were calculated using Prism (Graphpad) to plot dose-response  
406 curves, normalized using the average of the no virus wells as 100% neutralization, and the  
407 average of the no serum wells as 0%. The limit of detection (LOD) of 25 was determined by  
408 taking 1.96 standard deviation of the mean titer of the control MVA samples.

409

410 **Quantitation of infectious SARS-CoV-2.** Lungs, brains, and nasal turbinates were  
411 homogenized, cleared of debris by centrifugation at 3800xg for 10 min and serial 10-fold  
412 dilutions were applied in quadruplicate to Vero E6 hTMPRSS2 cells in DMEM+Glutamax  
413 (ThermoFisher) supplemented with 2% heat-inactivated FBS and 1% Antibiotic-Antimycotic in  
414 96-well microtiter plates. After 72 h, the plates were stained with crystal violet and the Reed-  
415 Muench method was used to determine the concentration at which 50% of the cells displayed a  
416 cytopathic effect (TCID<sub>50</sub>).

417

418 **Quantitation of SARS-CoV-2 sgRNAs.** RNA was extracted from homogenates of lungs and  
419 turbinates using Trizol; contaminating DNA was removed and RNA was reverse-transcribed.

420 SARS-CoV-2 sgS and sgN transcripts and 18S rRNA were quantified by ddPCR with specific  
421 primers using an automated droplet generator and droplet reader (BioRad).

422

423 **Safety and Ethics.** All experiments and procedures involving mice were approved under  
424 protocol LVD29E by the NIAID Animal Care and Use Committee according to standards set  
425 forth in the NIH guidelines, Animal Welfare Act, and US Federal Law. Euthanasia was carried  
426 out using carbon dioxide inhalation in accordance with the American Veterinary Medical  
427 Association Guidelines for Euthanasia of Animals (2013 Report of the AVMA Panel of  
428 Euthanasia). Experiments with SARS-CoV-2 were carried out under BSL-3 containment.

429

430 **Data Availability.** All data is included in the manuscript and supporting information.

431

## 432 **ACKNOWLEDGEMENTS**

433 We thank Reed Johnson and Nicole Lackemeyer of the NIAID COVID Virology Core  
434 Laboratory and Vincent Munster of the NIAID Laboratory of Virology for stocks of SARS-CoV-  
435 2. The technical staff of the NIAID Comprehensive Medical Branch provided excellent animal  
436 care. The work was supported by the Division of Intramural Research of NIAID.

437

## 438 **AUTHOR CONTRIBUTIONS**

439 B.M. and P.E. designed experiments, C.A.C. and J.L.A. carried out experiments, B.M. wrote the  
440 paper, C.A.C. prepared the figures, and all authors edited the final manuscript.

441

## 442 **COMPETING INTEREST STATEMENT**

443 The authors declare no competing interest.

444

445 **REFERENCES**

- 446 1 Polack, F. P. *et al.* Safety and Efficacy of the BNT162b2 mRNA Covid-19 Vaccine. *N*  
447 *Engl J Med* **383**, 2603-2615, doi:10.1056/NEJMoa2034577 (2020).
- 448 2 Baden, L. R. *et al.* Efficacy and Safety of the mRNA-1273 SARS-CoV-2 Vaccine. *N*  
449 *Engl J Med* **384**, 403-416, doi:10.1056/NEJMoa2035389 (2021).
- 450 3 Sadoff, J. *et al.* Safety and Efficacy of Single-Dose Ad26.COV2.S Vaccine against  
451 Covid-19. *N Engl J Med* **384**, 2187-2201, doi:10.1056/NEJMoa2101544 (2021).
- 452 4 Falsey, A. R. *et al.* Phase 3 Safety and Efficacy of AZD1222 (ChAdOx1 nCoV-19)  
453 Covid-19 Vaccine. *N Engl J Med* **385**, 2348-2360, doi:10.1056/NEJMoa2105290 (2021).
- 454 5 Robson, F. *et al.* Coronavirus RNA Proofreading: Molecular Basis and Therapeutic  
455 Targeting. *Mol Cell* **80**, 1136-1138, doi:10.1016/j.molcel.2020.11.048 (2020).
- 456 6 Harvey, W. T. *et al.* SARS-CoV-2 variants, spike mutations and immune escape. *Nat Rev*  
457 *Microbiol* **19**, 409-424, doi:10.1038/s41579-021-00573-0 (2021).
- 458 7 Riemersma, K. K. *et al.* Shedding of infectious SARS-CoV-2 despite vaccination. *PLoS*  
459 *Pathog* **18**, e1010876, doi:10.1371/journal.ppat.1010876 (2022).
- 460 8 Chalkias, S. *et al.* A Bivalent Omicron-Containing Booster Vaccine against Covid-19. *N*  
461 *Engl J Med* **387**, 1279-1291, doi:10.1056/NEJMoa2208343 (2022).
- 462 9 Moss, B. Genetically engineered poxviruses for recombinant gene expression,  
463 vaccination, and safety. *Proc. Natl. Acad. Sci. USA* **93**, 11341-11348 (1996).
- 464 10 Volz, A. & Sutter, G. in *Advances in Virus Research, Vol 97* Vol. 97 *Advances in Virus*  
465 *Research* (eds M. Kielian, T. C. Mettenleiter, & M. J. Roossinck) 187-243 (2017).
- 466 11 Chiuppesi, F. *et al.* Safety and immunogenicity of a synthetic multiantigen modified  
467 vaccinia virus Ankara-based COVID-19 vaccine (COH04S1): an open-label and

- 468 randomised, phase 1 trial. *Lancet Microbe* **3**, e252-e264, doi:10.1016/S2666-  
469 5247(22)00027-1 (2022).
- 470 12 Liu, R. K. *et al.* One or two injections of MVA-vectorized vaccine shields hACE2  
471 transgenic mice from SARS-CoV-2 upper and lower respiratory tract infection.  
472 *Proceedings of the National Academy of Sciences of the United States of America* **118**,  
473 doi:10.1073/pnas.2026785118 (2021).
- 474 13 Routhu, N. K. *et al.* A modified vaccinia Ankara vector-based vaccine protects macaques  
475 from SARS-CoV-2 infection, immune pathology, and dysfunction in the lungs. *Immunity*  
476 **54**, 542+, doi:10.1016/j.immuni.2021.02.001 (2021).
- 477 14 Tscherne, A. *et al.* Immunogenicity and efficacy of the COVID-19 candidate vector  
478 vaccine MVA-SARS-2-S in preclinical vaccination. *Proc Natl Acad Sci U S A* **118**,  
479 doi:10.1073/pnas.2026207118 (2021).
- 480 15 Garcia-Arriaza, J. *et al.* COVID-19 vaccine candidates based on modified vaccinia virus  
481 Ankara expressing the SARS-CoV-2 spike induce robust T- and B-cell immune  
482 responses and full efficacy in mice. *J Virol*, doi:10.1128/JVI.02260-20 (2021).
- 483 16 Meseda, C. A. *et al.* MVA vector expression of SARS-CoV-2 spike protein and  
484 protection of adult Syrian hamsters against SARS-CoV-2 challenge. *Npj Vaccines* **6**,  
485 doi:10.1038/s41541-021-00410-8 (2021).
- 486 17 Bosnjak, B. *et al.* Intranasal Delivery of MVA Vector Vaccine Induces Effective  
487 Pulmonary Immunity Against SARS-CoV-2 in Rodents. *Frontiers in Immunology* **12**,  
488 doi:10.3389/fimmu.2021.772240 (2021).
- 489 18 Americo, J. L., Cotter, C. A., Earl, P. L., Liu, R. & Moss, B. Intranasal inoculation of an  
490 MVA-based vaccine induces IgA and protects the respiratory tract of hACE2 mice from

- 491 SARS-CoV-2 infection. *Proc Natl Acad Sci U S A* **119**, e2202069119,  
492 doi:10.1073/pnas.2202069119 (2022).
- 493 19 Perez, P. *et al.* Intranasal administration of a single dose of MVA-based vaccine  
494 candidates against COVID-19 induced local and systemic immune responses and protects  
495 mice from a lethal SARS-CoV-2 infection. *Frontiers in Immunology* **13**,  
496 doi:10.3389/fimmu.2022.995235 (2022).
- 497 20 Halfmann, P. J. *et al.* SARS-CoV-2 Omicron virus causes attenuated disease in mice and  
498 hamsters. *Nature*, doi:10.1038/s41586-022-04441-6 (2022).
- 499 21 Suryawanshi, R. K. *et al.* Limited cross-variant immunity from SARS-CoV-2 Omicron  
500 without vaccination. *Nature* **607**, 351-355, doi:10.1038/s41586-022-04865-0 (2022).
- 501 22 Speranza, E. *et al.* Single-cell RNA sequencing reveals SARS-CoV-2 infection dynamics  
502 in lungs of African green monkeys. *Sci Transl Med* **13**,  
503 doi:10.1126/scitranslmed.abe8146 (2021).
- 504 23 Kim, D. *et al.* The Architecture of SARS-CoV-2 Transcriptome. *Cell* **181**, 914-921 e910,  
505 doi:10.1016/j.cell.2020.04.011 (2020).
- 506 24 Kaplonek, P. *et al.* mRNA-1273 vaccine-induced antibodies maintain Fc effector  
507 functions across SARS-CoV-2 variants of concern. *Immunity* **55**, 355-365 e354,  
508 doi:10.1016/j.immuni.2022.01.001 (2022).
- 509

510  
511  
512  
513  
514  
515  
516  
517  
518  
519  
520  
521  
522  
523  
524  
525  
526  
527  
528  
529  
530  
531  
532  
533

## FIGURE LEGENDS

### **Fig. 1. Protective immunity to SARS-CoV-2 variants following IM vaccination with rMVA-**

**W. (A)** K18-hACE2 mice were vaccinated IM twice with MVA control (n=40) or rMVA-W (n=40), divided into groups of n=10 and challenged with CoV-W, -B, or -D two weeks later. **(B, C)** Serum antibody binding to the Wuhan S RBD and neutralization of pseudoviruses rVSV-W, -B or -D at 3 and 5 weeks after vaccination. **(D, E)** Time course of weight loss and survival on days after challenge. **(F, G)** Recovery of SARS-CoV-2 from lungs and nasal turbinates on day 5 after challenge. **(H, I)** Copies of sgRNAs N and S normalized to 18s RNA from lungs and nasal turbinates on day 5 after challenge. Abbreviation: D, day; sac, sacrifice. \*  $p \leq 0.03$ ; \*\*  $p \leq 0.002$ ; \*\*\*  $p \leq 0.0002$ ; \*\*\*\*  $p \leq 0.0001$ . Significance not calculated when values of one group were all below the limit of detection.

### **Fig. 2. Duration of cross-protective immunity following IM vaccination with rMVA-W. (A)**

K18-hACE2 mice were vaccinated IM twice with MVA control (n=8) divided into groups of 2 – 3 or rMVA-W (n=15), divided into groups 5 and challenged with CoV-W, -B, or -D approximately 9 months later. **(B)** Binding of serum antibodies to Wuhan S protein determined by ELISA. **(C)** Neutralization of pseudoviruses rVSV-W, -B and -D by serum obtained at weeks 3, 5 and 41. **(D)** Weights of mice on day 5 after challenge relative to starting weights. **(E, F)** Recovery of SARS-CoV-2 from lungs and nasal turbinates on day 5 after challenge. **(G, H)** Copies of sgRNAs N and S normalized to 18s RNA from lungs and nasal turbinates on day 5 after challenge.



534 **Fig. 3. Inhibition of early stages of variant SARS-CoV-2 infections in mice immunized IM**  
535 **with rMVA-W.** (A) K18-hACE2 mice were vaccinated IM twice with MVA control (n=40) or  
536 rMVA-W (n=40), divided into groups of 10 and challenged 2 weeks later with CoV-W, -B, -D or  
537 -O 3. (B) Binding of serum antibodies to Wuhan RBD after first and second immunizations  
538 determined by ELISA. (C) Neutralization of pseudoviruses rVSV-W, -B, -D and -O by sera  
539 obtained after the first and second immunizations. (D, E) Recovery of SARS-CoV-2 from lungs  
540 and nasal turbinates on days 2 and 4 after challenge. (F, G) Copies of sgRNAs N and S  
541 normalized to 18s RNA from lungs and nasal turbinates on days 2 and 4 after challenge.

542

543 **Fig. 4. Greater inhibition of early stages of variant SARS-CoV-2 infections in mice**  
544 **immunized IN with rMVA-W.** (A) K18-hACE2 mice were vaccinated IN twice with MVA  
545 control (n=31) or rMVA-W (n=32), divided into groups of 7 or 8 and 2 weeks later challenged  
546 with CoV-W, -B, or -D. (B) Serum antibody binding to Wuhan RBD determined by ELISA after  
547 the first and second immunizations. (C) Neutralization of pseudoviruses rVSV-W, -B, -D and -O  
548 by serum obtained after the first and second immunizations. (D, E, F) Recovery of SARS-CoV-2  
549 from lungs and nasal turbinates on days 2 and brain on day 4 after challenge. (G,H) Copies of  
550 sgRNAs N and S normalized to 18s RNA from lungs and nasal turbinates on days 2 and 4 after  
551 challenge. (I) Fold-reduction of sgRNAs in nasal turbinates on day 2 for mice immunized IN and  
552 IM. Data replotted from Fig. 3G and 4H.

553

554 **Fig. 5. Neutralizing antibody responses following boosts with rMVAs expressing matched**  
555 **or mismatched S.** (A-C, E-) Matched prime and boost IM vaccinations of C57BL/6 mice (n= 40  
556 per group) with rMVA-W, -D, and -O. (A) Timeline. (B) Neutralization of pseudoviruses rVSV-

557 W, -D and -O by serum obtained after the prime with rMVA-W, -D and -O and after the matched  
558 boost. (C) Binding of pooled serum from the second bleed to Wuhan and Omicron S determined  
559 by ELISA. (D) Neutralization of pseudoviruses by sera from mice sublethally infected with  
560 CoV-W, CoV-D or CoV-O, (E) Serum neutralizing titers of mice one day after receiving pooled  
561 serum IP from naïve mice or mice immunized twice with MVA, rMVA-W or rMVA-O. (F, G)  
562 Recovery of SARS-CoV-2 and sgRNAs from the lungs at 4 days after challenge of passively  
563 immunized mice. (H, I) C57BL/6 mice immunized twice with rMVA-W and boosted with  
564 rMVA-W, -B, -D, or -O. (H) Timeline. (I) Neutralization of pseudoviruses rVSV-W, -B, -D and  
565 -O by serum obtained after the third immunization. (i) Neutralization of pseudoviruses by sera  
566 obtained after the fourth immunization.

567

568 **Fig. 6. Protection of SARS-CoV-2 challenged mice that received matched or mismatched**  
569 **rMVAs IM.** (A) Timeline showing IM immunizations of K18-hACE2 mice (n=9 per group)  
570 with MVA, rMVA-W and rMVA-O and matched and mismatched challenges with CoV-W and  
571 CoV-O. (B) Neutralization of pseudoviruses rVSV-W and -O by serum obtained after one and  
572 two IM immunizations with MVA, rMVA-W or rMVA-O. (C, D) Recovery of SARS-CoV-2  
573 from lungs and nasal turbinates on days 2 and 4 after challenge with CoV-W or CoV-O. (E, F)  
574 Copies of sgRNAs N and S normalized to 18s RNA from lungs and nasal turbinates on days 2  
575 and 4 after challenge.

576

577 **Fig. 7. Protection of CoV-W and CoV-O challenged mice vaccinated IN with rMVA-O.** (A)  
578 Timeline of IN immunizations of K18-hACE2 mice (n=13 per group) with MVA or rMVA-O  
579 and matched and mismatched challenges with CoV-W and CoV-O. (B) Neutralization of

580 pseudoviruses rVSV-W and -O by serum obtained after one and two IN immunizations with  
581 MVA or rMVA-O. (C) Weight loss of mice following challenge with CoV-O or CoV-W. (D, E)  
582 Recovery of virus and sgRNAs in the lungs of mice challenged with CoV-W or CoV-O. (F, G)  
583 Recovery of virus and sgRNAs in the nasal turbinates of mice challenged with CoV-W or CoV-  
584 O. (H) Fold-reduction of sgRNAs in nasal turbinates on day 2 for mice immunized IN and IM.

585

586 **Fig. S1. Relative virulence of SAR-CoV-2 variants.** (A -F) K18-hACE2 mice (n=3 per group)  
587 were infected IN with  $10^2$  to  $10^4$  TCID<sub>50</sub> of indicated SARS-CoV-2 strains Washington (CoV-W,  
588 Beta (CoV-B), Delta (CoV-D) and weight loss and survival plotted. (G) K18-hACE2 mice (n=5)  
589 were infected IN with  $5 \times 10^4$  TCID<sub>50</sub> of CoV-O and weight loss plotted. †, death. (H, I) K18-  
590 hACE2 mice (n=3 per group) were infected IN with  $5 \times 10^3$  to  $5 \times 10^4$  TCID<sub>50</sub> of CoV-W or  
591 CoV-O and virus titers in the lungs and nasal turbinates determined on day 2.

592

593 **Fig. S2. Expression of S by variant rMVAs.** (A) Cells were mock-infected or infected with  
594 rMVA-W, -B, -D, or -O and Western blots probed with mouse anti-Flag (Millipore Sigma),  
595 rabbit anti-Wuhan S-RBD (Sino Biologicals), rabbit anti-GFP (Thermofisher), mouse anti-actin  
596 (Santa Cruz), donkey anti-mouse IRDye 680RD (LiCor) and donkey anti-rabbit IRDye800CW  
597 (LiCor). The positions of size markers with mass in kDa are shown on the left. (B) Ratios of  
598 intensities of the bands probed with anti-Flag and anti-GFP plotted. (C) Ratios of intensities of  
599 bands probed with anti-RBD and anti-GFP plotted. (D) Cells were infected with MVA, rMVA-  
600 A, -W, -B, -D and -O, fixed without permeabilization and incubated with biotinylated his-tag  
601 hACE2 (Sino Biologicals) followed by APC streptavidin (BD Pharmagin). Stained cells were

602 analyzed by flow cytometry. Cells were first gated for GFP fluorescence and then for APC.

603 Percent of GFP+ cells that stained with hACE2 are indicated.

604

605 **Fig. S3. Comparison of sequences of S in rMVAs, rVSVs and SARS-CoV-2 variants.** All

606 sequences are compared to Wuhan Genbank# MN908947.3 and only differences are listed.

607 Amino acids in red are in RBD; amino acids in purple represent modifications in rMVAs for

608 stability of the prefusion form of S, prevent furin cleavage and endoplasmic retrieval, and add a 3

609 x Flag tag as previously described for Wuhan <sup>12</sup>. Abbreviation: del, deletion.

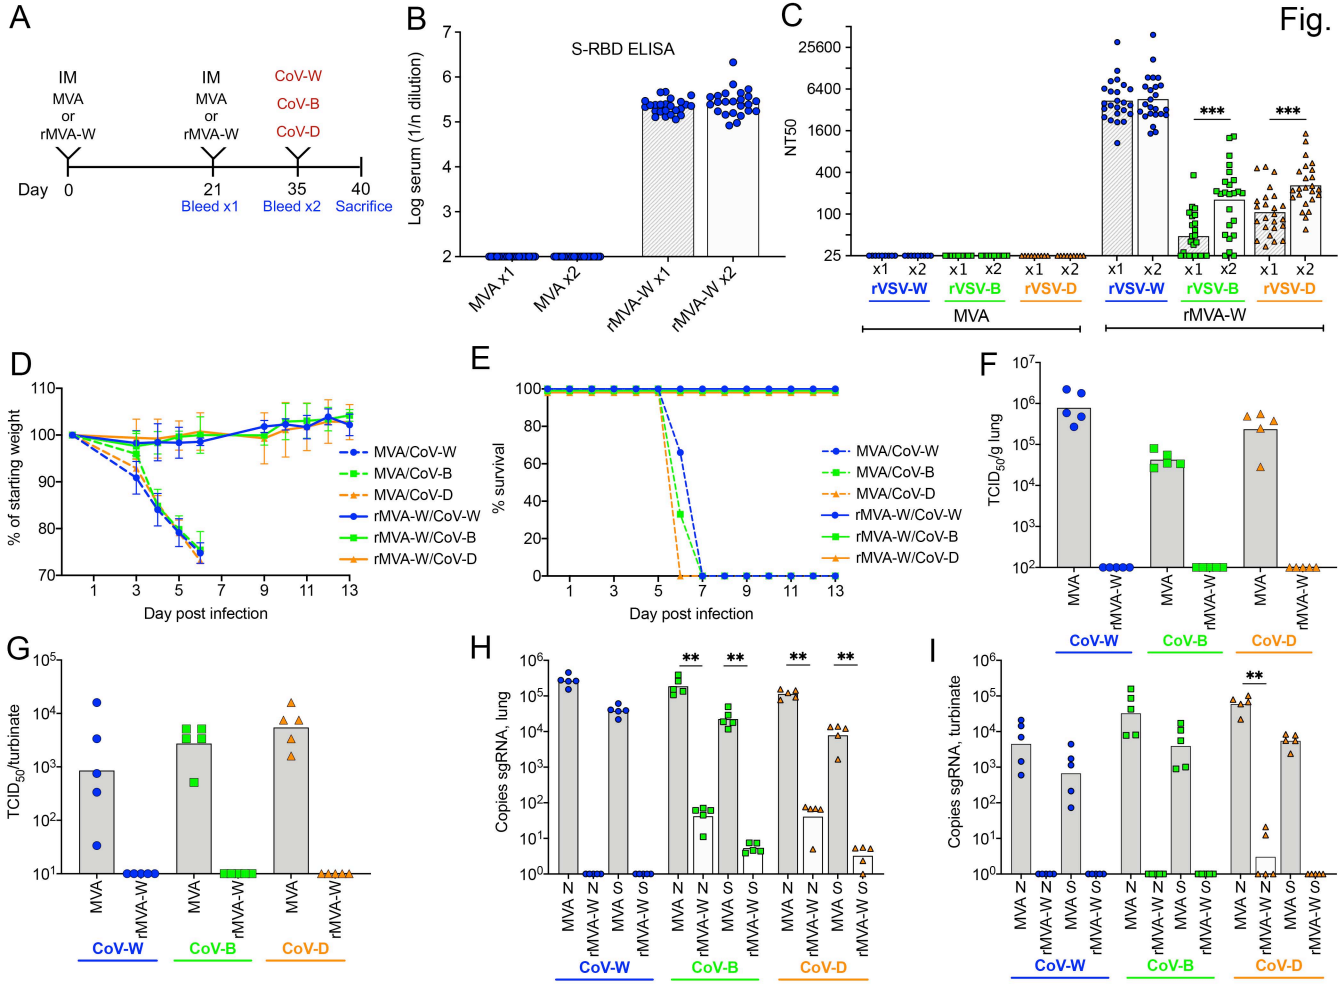

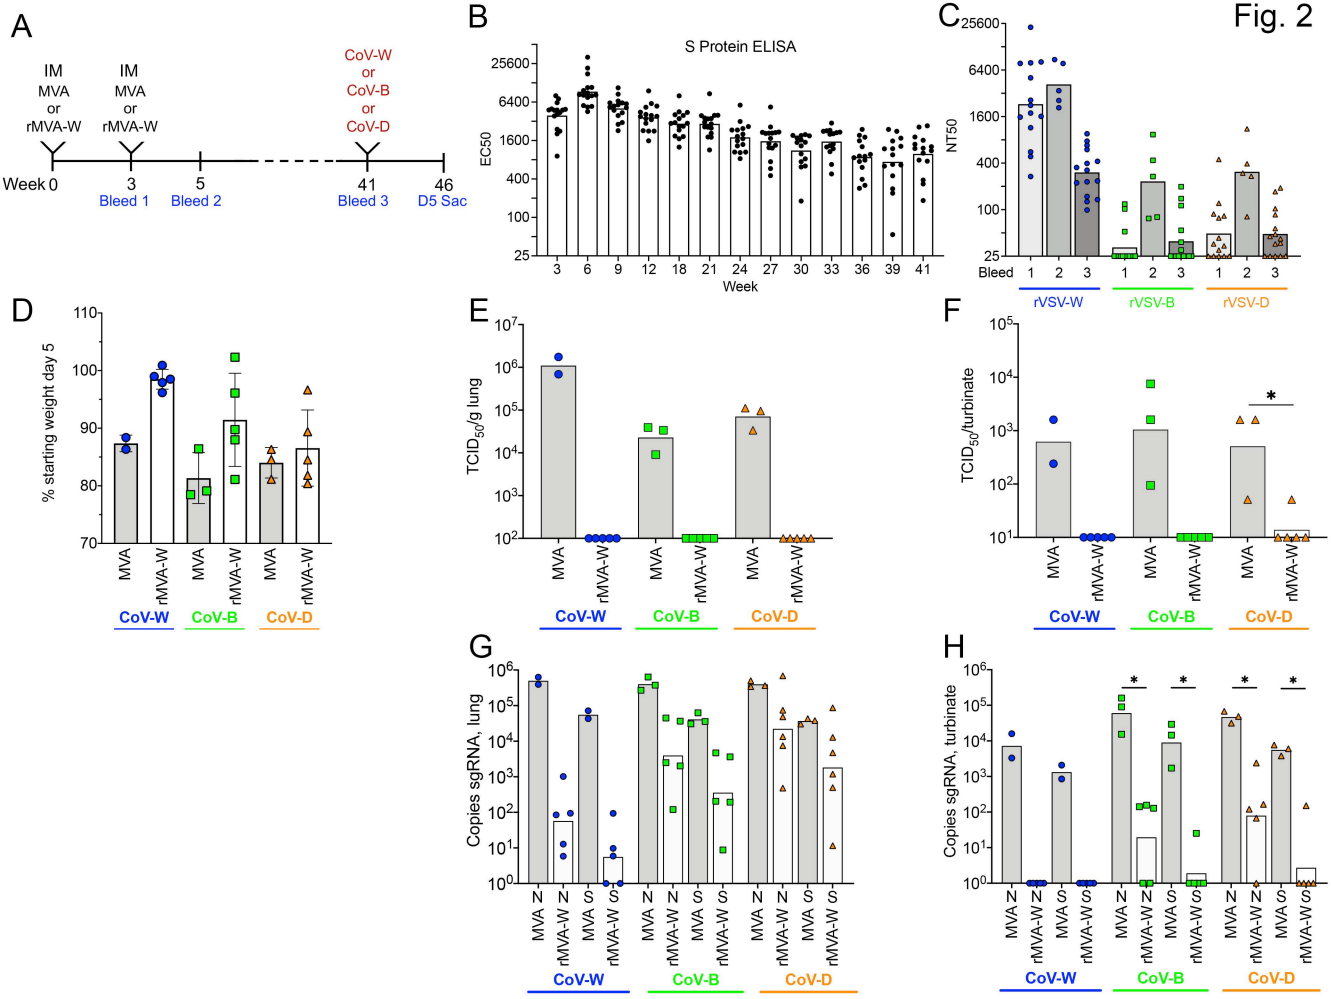

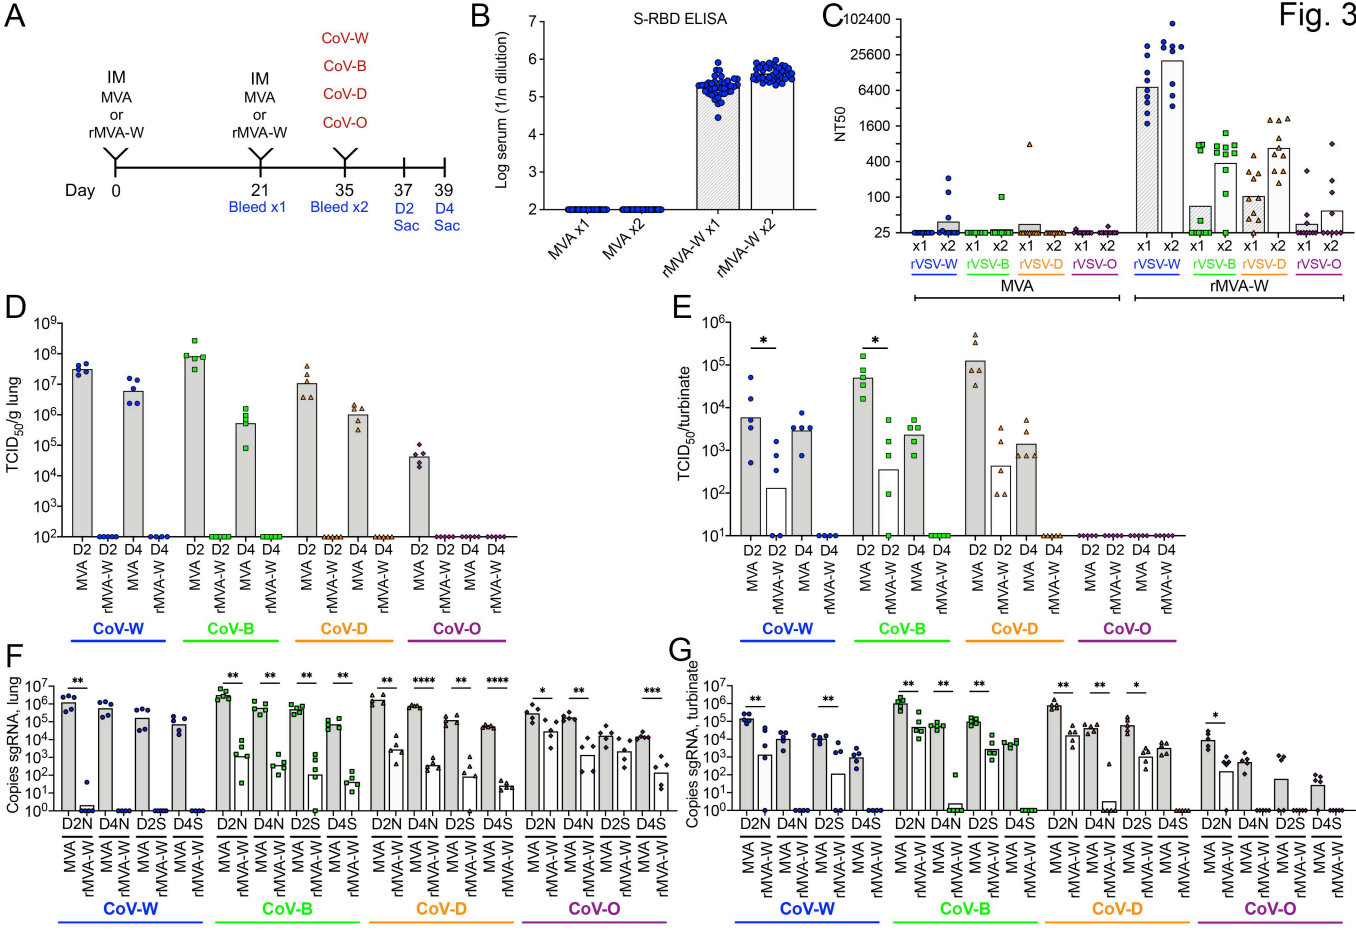

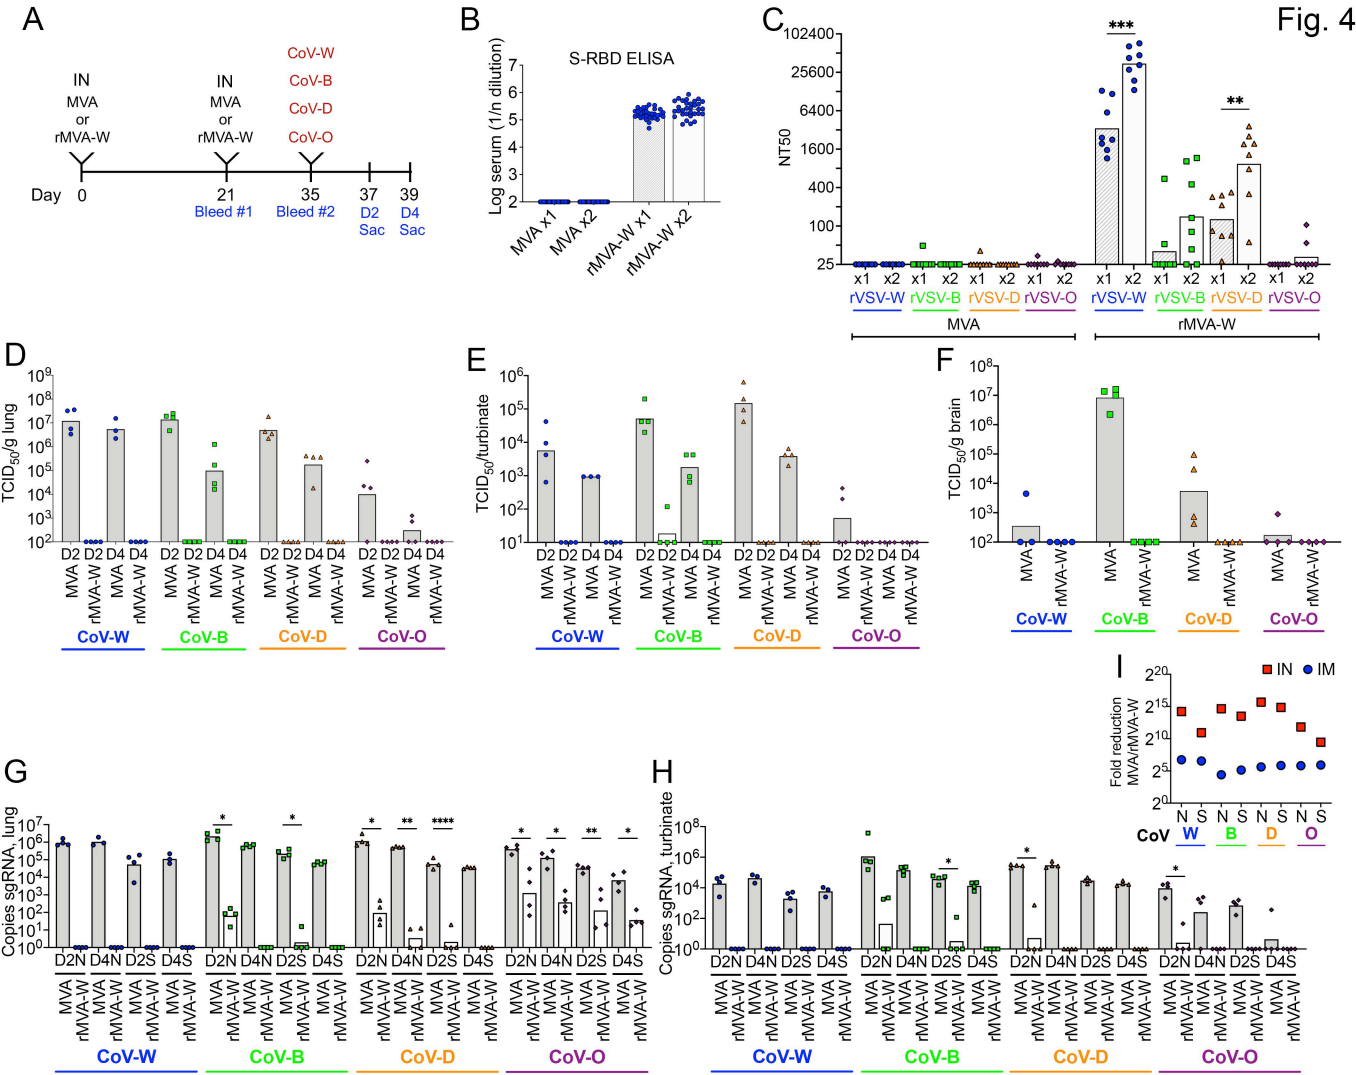



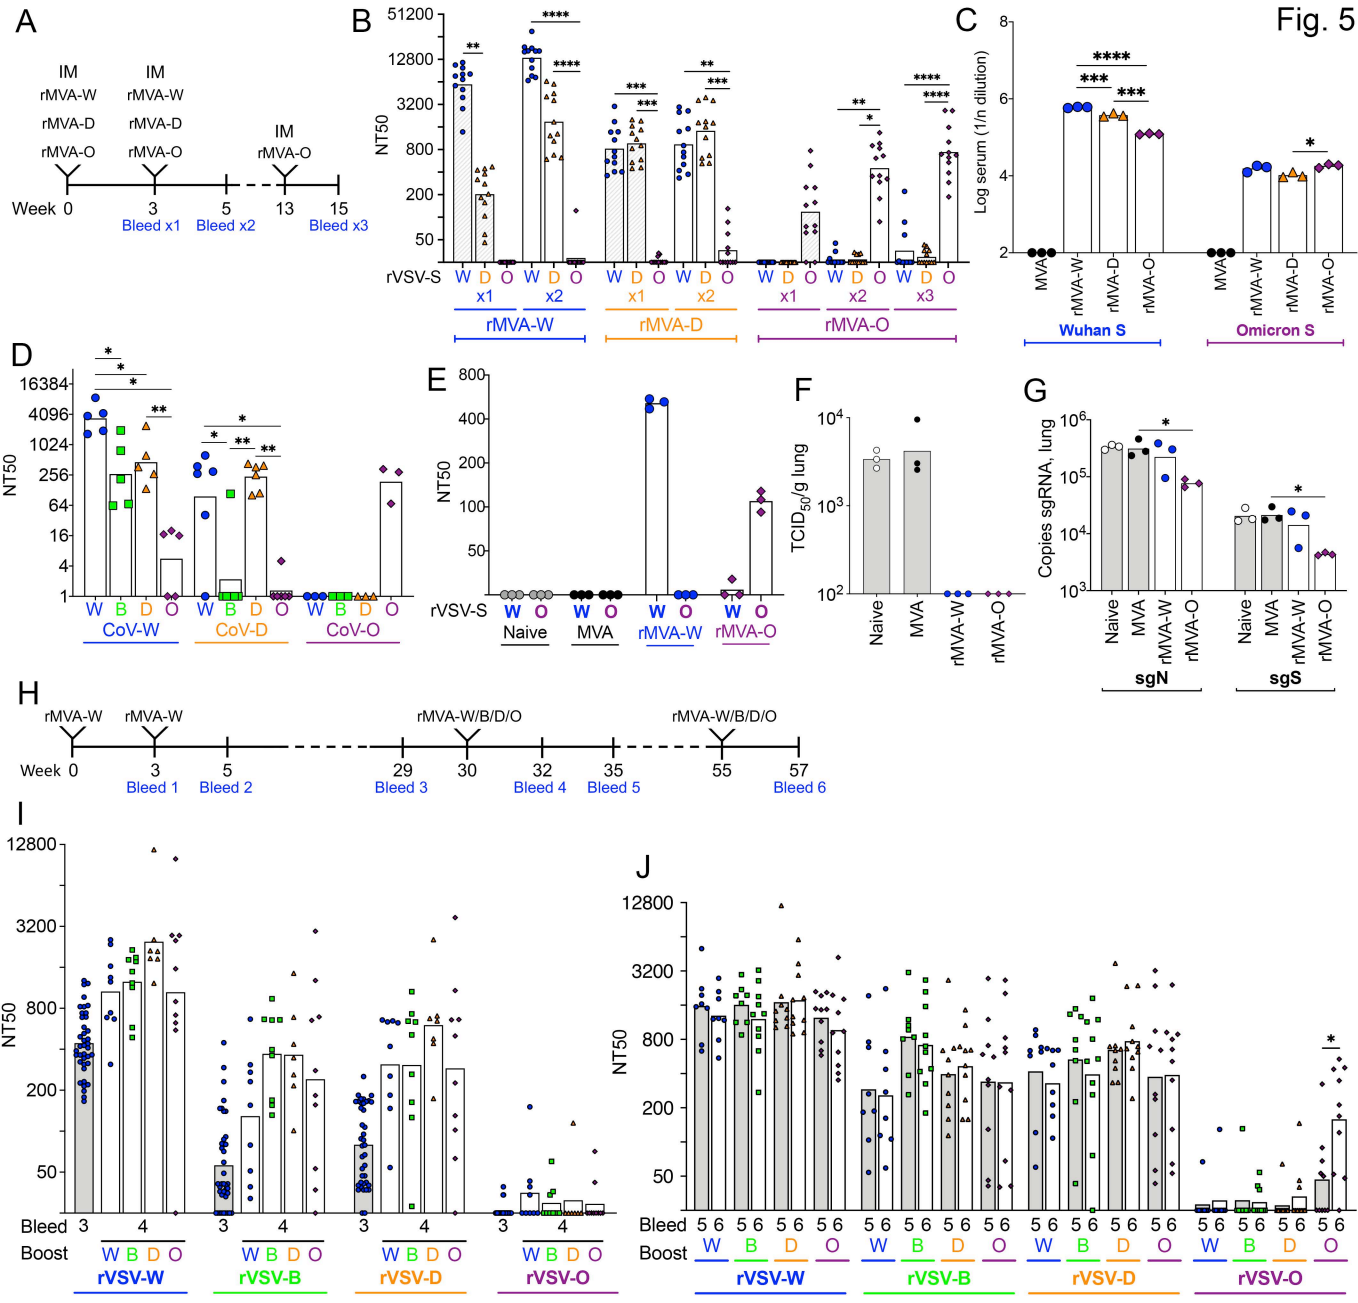

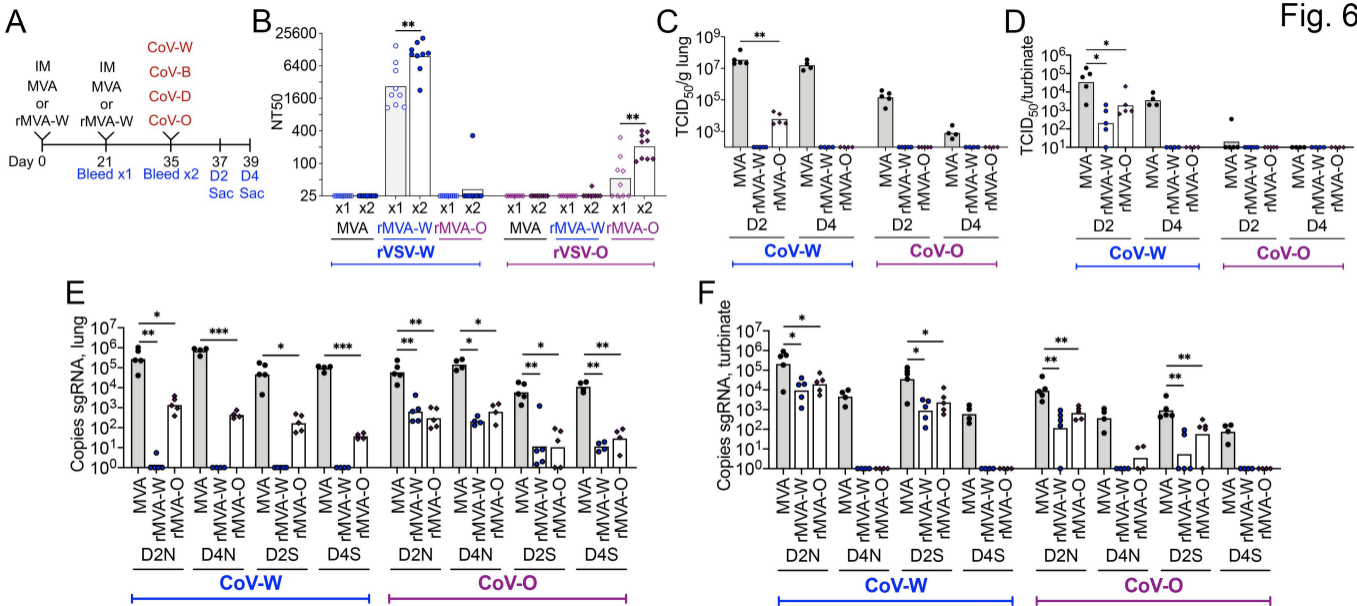

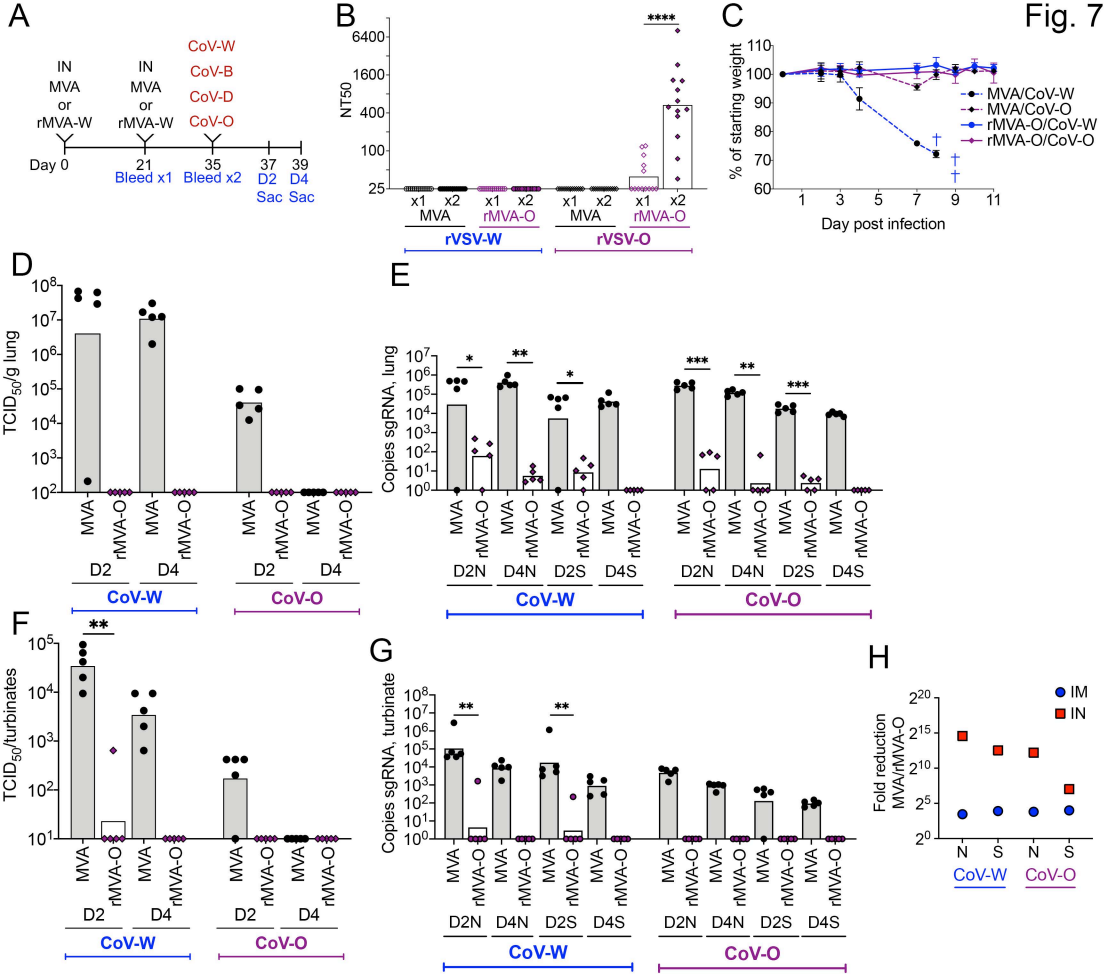

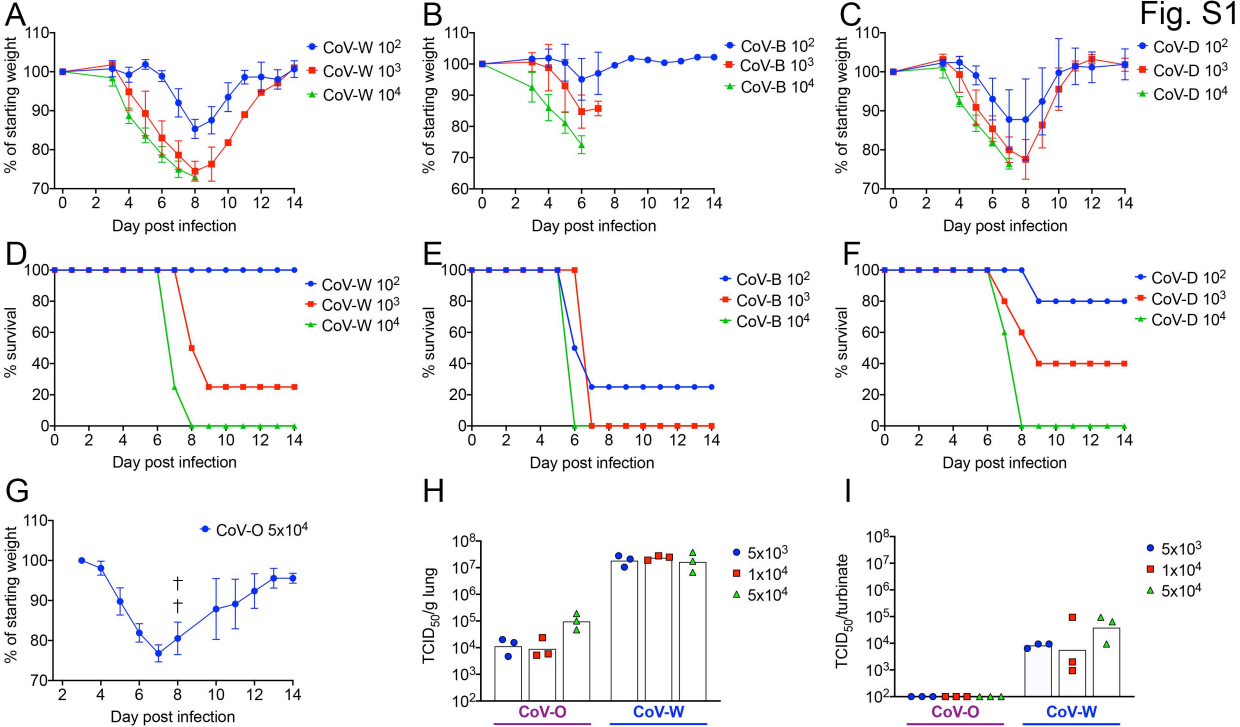

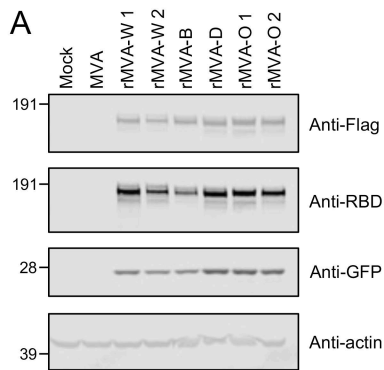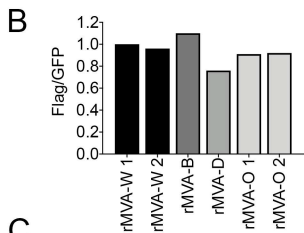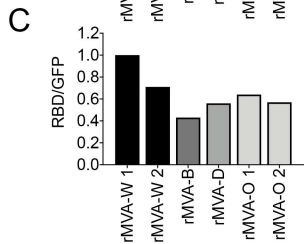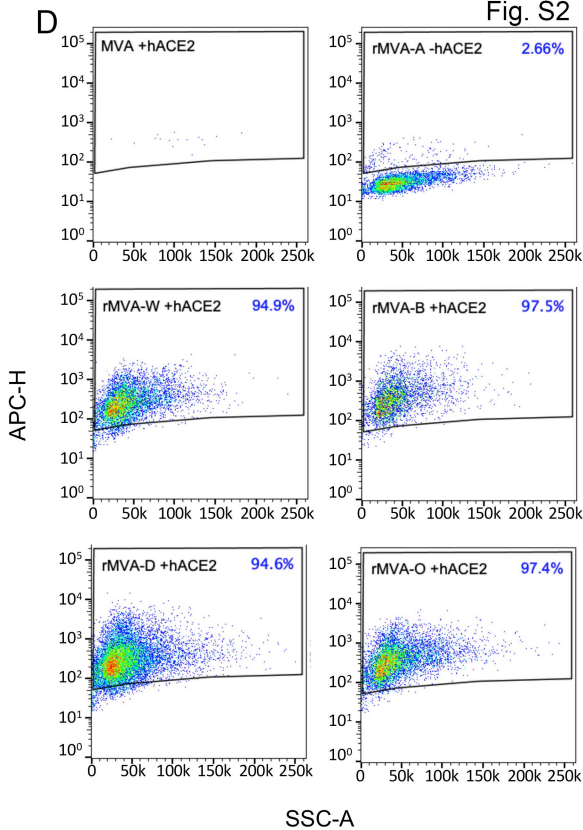

| Pseudovirus S   |  | Changes compared to Reference Wuhan Sequence Genbank# MN908947.3                                                                                                                                                                                                                                                                         |
|-----------------|--|------------------------------------------------------------------------------------------------------------------------------------------------------------------------------------------------------------------------------------------------------------------------------------------------------------------------------------------|
| Wuhan           |  | No changes                                                                                                                                                                                                                                                                                                                               |
| Beta            |  | L18F, D80A, D215G, del241-243, R246I, <b>K417N, E484K, N501Y</b> , D614G, A701V                                                                                                                                                                                                                                                          |
| Delta           |  | T19R, G142D, del156-157, R158G, <b>L452R, T478K</b> , D614G, P681R, D950N                                                                                                                                                                                                                                                                |
| Omicron         |  | A67V, del69-70, T95I, G142D, del143-145, del211N, L212I, ins214EPE, <b>G339D, S371L, S373P, S375F, K417N, N440K, G446S, S477N, T478K, E484A, Q493R, G496S, Q498R, N501Y, Y505H</b> , T547K, D614G, H655Y, N679K, P681H, N764K, D796Y, N856K, Q954H, N969K, L981F                                                                         |
| CoV challenge S |  | Changes compared to Reference Wuhan Sequence Genbank# MN908947.3                                                                                                                                                                                                                                                                         |
| Washington      |  | No changes                                                                                                                                                                                                                                                                                                                               |
| Beta            |  | L18F, D80A, D215G, del241-243, <b>K417N, E484K, N501Y</b> , D614G, Q677H, R682W, A701V                                                                                                                                                                                                                                                   |
| Delta           |  | T19R, G142D, del156-157, R158G, A222V, <b>L452R, T478K</b> , D614G, P681R, D950N                                                                                                                                                                                                                                                         |
| Omicron         |  | A67V, del69-70, T95I, G142D, del143-145, del211N, L212I, ins214EPE, <b>G339D, S371L, S373P, S375F, K417N, N440K, G446S, S477N, T478K, E484A, Q493R, G496S, Q498R, N501Y, Y505H</b> , T547K, D614G, H655Y, N679K, P681H, N764K, D796Y, N856K, Q954H, N969K, L981F                                                                         |
| rMVA-S          |  | Changes compared to Reference Wuhan Sequence Genbank# MN908947.3                                                                                                                                                                                                                                                                         |
| Wuhan           |  | <b>R682G, R683S, R685S, K986P, V987P, del1255-1273, 3XFlag</b>                                                                                                                                                                                                                                                                           |
| Beta            |  | L18F, D80A, D215G, del241-243, R246I, <b>K417N, E484K, N501Y</b> , D614G, <b>R682G, R683S, R685S</b> , A701V, <b>K986P, V987P, del1255-1273, 3XFlag</b>                                                                                                                                                                                  |
| Delta           |  | T19R, G142D, del156-157, R158G, <b>K417N, L452R, T478K</b> , D614G, P681R, <b>R682G, R683S, R685S</b> , D950N, <b>K986P, V987P, del1255-1273, 3XFlag</b>                                                                                                                                                                                 |
| Omicron         |  | A67V, del69-70, T95I, G142D, del143-145, del211N, L212I, ins212EPE, <b>G339D, S371L, S373P, S375F, K417N, N440K, G446S, S477N, T478K, E484A, Q493K, G496S, Q498R, N501Y, Y505H</b> , T547K, D614G, H655Y, N679K, P681H, <b>R682G, R683S, R685S</b> , N764K, D796Y, N856K, Q954H, N969K, L981F, <b>K986P, V987P, del1255-1273, 3XFlag</b> |
